1 **Molecular Mechanisms Governing Shade Responses in Maize**

2 Qingbiao Shi<sup>a,1</sup>, Fanying Kong<sup>a,1</sup>, Haisen Zhang<sup>a,1</sup>, Yu'e Jiang<sup>a</sup>, Siqi Heng<sup>a</sup>, Ran Liang<sup>a</sup>,  
3 Jisheng Liu<sup>b</sup>, Xiaoduo Lu<sup>b</sup>, Pinghua Li<sup>c</sup>, Gang Li<sup>a,2</sup>

4

5 <sup>a</sup>College of Life Science, State Key Laboratory of Crop Biology, Shandong Agricultural  
6 University, Tai'an, Shandong 271018, China

7 <sup>b</sup>College of Life Science, Qilu Normal University, Jinan, 250013, China

8 <sup>c</sup>College of Agronomy, State Key Laboratory of Crop Biology, Shandong Agricultural  
9 University, Tai'an, Shandong 271018, China

10

11 <sup>1</sup> Q.S., F.K., and H.Z. contributed equally to this work.

12 <sup>2</sup> To whom correspondence may be addressed. Email: [gangli@sdau.edu.cn](mailto:gangli@sdau.edu.cn)

13

14 The authors declare no conflict of interest.

15

16 **Running title:** Shade responses in maize

17

18 **Highlight:** Our findings not only increase the understanding of the regulatory network  
19 of the shade avoidance in maize, and also provide a useful resource for maize genetics  
20 and breeding.

21

22 **Abstract**

23 Light is one of the most important environmental factors affecting plant growth and  
24 development. Plants use shade avoidance and shade tolerance strategies to adjust  
25 their growth and development thus increase their success in the competition for  
26 incoming light. To investigate the mechanism of shade responses in maize (*Zea mays*),  
27 we examined the anatomical and transcriptional dynamics of the early shade response  
28 in seedlings of the B73 inbred line. Transcriptome analysis identified 912 differentially  
29 expressed genes, including genes involved in light signaling, auxin responses, and cell  
30 elongation pathways. Grouping transcription factor family genes and performing  
31 enrichment analysis identified multiple types of transcription factors that are  
32 differentially regulated by shade and predicted putative core genes responsible for  
33 regulating shade avoidance syndrome. For functional tests, we ectopically over-  
34 expressed *ZmHB53*, a type II HD-ZIP transcription factor gene significantly induced by  
35 shade, in *Arabidopsis thaliana*. Transgenic Arabidopsis plants overexpressing  
36 *ZmHB53* exhibited narrower leaves, earlier flowering, and enhanced expression of  
37 shade-responsive genes, suggesting that *ZmHB53* participates in the regulation of  
38 shade responses in maize. This study increases our understanding of the regulatory  
39 network of the shade response in maize and provides a useful resource for maize  
40 genetics and breeding.

41 **Key words:** shade avoidance syndrome, RNA-seq, HD-ZIP transcription factor, maize

## 42 **Introduction**

43 Light plays a fundamental role in plant growth and development. Increasing the  
44 planting density of crops, particularly grasses such as maize (*Zea mays*), to increase  
45 yield is a common practice in modern agriculture. However, under high-density  
46 cultivation, light, water, and nutrients limit plant growth and seed production. Blue and  
47 red wavelengths light are preferentially absorbed by photosynthetic pigments of the  
48 upper leaves of the canopy for photosynthesis, resulting in a reduction of  
49 photosynthetically active radiation (PAR), and low ratio of red to far-red (R:FR) light in  
50 the lower leaves. In most plant species, the reduction of PAR, low R:FR and low blue  
51 light act as shade signals to induce shade avoidance syndrome (SAS), including  
52 elongation of stems and petioles and inhibition of the outgrowth of axillary buds, thus  
53 allowing plants to reach light and shade their neighbors (Keuskamp et al., 2010;  
54 Sharwood et al., 2014; Ballaré et al., 2017; Pignon et al., 2017). Long-term shade  
55 treatments lead to severe SAS and significantly decrease seed production (Casal,  
56 2013); for example, maize grain yield may be reduced by up to 60% by long-term  
57 shade treatment (Cui et al., 2015). Therefore, understanding shade avoidance  
58 responses and improving plant success in the competition for light, without decreasing  
59 yields, are important goals to improve high-density planting of crops (Maddonni et al.,  
60 2001; Page et al., 2010).

61 The molecular network regulating SAS has been well documented in *Arabidopsis*  
62 *thaliana*. Various shade signals are primarily perceived by photoreceptors, including  
63 phytochromes and cryptochromes. Under high R:FR light, phytochromes (mostly phyB  
64 in *Arabidopsis*) enter the nucleus in the active form (far red-absorbing form, Pfr) and  
65 regulate numerous downstream genes, thereby suppressing the shade response  
66 (Kircher et al., 1999; Franklin, 2008; Chen et al., 2011). Low R:FR increases the ratio  
67 of inactive phyB (red-absorbing form, Pr) in the cytosol, thus releasing the inhibition of  
68 downstream signaling components and promoting the shade response (Kircher et al.,  
69 1999). The *Arabidopsis phyb* mutant and the maize *phyb1 phyb2* double mutant exhibit  
70 a constitutive SAS phenotype, including slender petioles, leaves, and accelerated stem  
71 elongation (Robson et al., 1993; Sheehan et al., 2007). Branch formation is also

72 inhibited in the early development of *phyb* mutants in sorghum (Kebrom et al., 2016).

73 PHYTOCHROME INTERACTING FACTORS (PIFs) act as important downstream  
74 signal transduction components of phytochromes and play a key role in SAS (Castillon  
75 et al., 2007; Leivar et al., 2011). Arabidopsis plants overexpressing *PIF4*, *PIF5*, and  
76 *PIF7* exhibit constitutive SAS under high R:FR conditions (Lorrain et al., 2008; Li et al.,  
77 2012). Consistent with this, the *pifq* (*pif1 pif3 pif4 pif5*) quadruple mutant and *pif7*  
78 mutants show short petioles and a reduced response to shade (Leivar et al., 2008; Li  
79 et al., 2012). Overexpressing *ZmPIF4* in Arabidopsis also produces constitutive SAS  
80 (Shi et al., 2018). Analyses of genome-wide downstream targets revealed that PIFs  
81 directly target hundreds of growth-promoting genes, such as *Aux/IAA* (*IAA19*, *IAA29*),  
82 *YUCCA* (*YUC2*, *YUC5*, *YUC8*, *YUC9*), *EXPANSINS* (*EXPA1*, *EXPB1*) and  
83 *XYLOGLUCAN ENDOTRANSGLYCOSYLASE/HYDROLASE* (*XTH15*, *XTH33*)  
84 (Zhang et al., 2013; Pfeiffer et al., 2014). In addition, the contents and sensitivities of  
85 free auxin, gibberellin (GA) and brassinosteroids were rapidly induced by shade  
86 treatments, thus promoting cell elongation in Arabidopsis (Bou-Torrent et al., 2014),  
87 bean (Beall et al., 1996) and sunflower (Kurepin et al., 2007).

88 In Arabidopsis, shade treatments rapidly induce the expression of many  
89 transcription factor genes, including *LONG HYPOCOTYL IN FAR-RED* (*HFR1*),  
90 *PHYTOCHROME RAPIDLY REGULATED GENE 1* (*PAR1*), *PAR2*, and *PIF3-LIKE1*  
91 (*PIL1*), which encode basic helix-loop-helix (bHLH) type transcription factors that  
92 negatively regulate PIF activities through physical interactions, thereby preventing an  
93 exaggerated shade response (Roigvillanova et al., 2006; Hornitschek et al., 2009;  
94 Hornitschek et al., 2012). Additionally, multiple homeodomain leucine zipper (HD-ZIP)  
95 and B-box (BBX) type transcription factors function in the shade response (Sorin et al.,  
96 2009; Gangappa et al., 2014).

97 In maize, although some of the early shade-responsive genes have been  
98 identified (Wang et al., 2016), their physiological functions and underlying mechanisms  
99 remain largely unknown. Here, we combined cytological and transcriptomic analysis  
100 with functional testing to investigate the anatomical and transcriptional dynamics of  
101 SAS in maize seedlings and predict the core responsive genes involved in the

102 regulation of SAS.

## 103 **Materials and Methods**

### 104 *Plant materials and growth conditions*

105 Seedlings of maize inbred lines were grown in growth chambers under a 12-hour  
106 light/12-hour dark cycle at 180  $\mu\text{mol}/\text{m}^2/\text{s}$  of light intensity at 25 °C. For short-term  
107 simulated shade treatment, seedlings of B73 (V3 stage) were transferred from white  
108 light to constant FR light (10.52  $\mu\text{mol}/\text{m}^2/\text{s}$ ) for 0, 1, and 3 h, followed by constant R  
109 light (50  $\mu\text{mol}/\text{m}^2/\text{s}$ ) for 1 h and then used for qPCR and RNA-seq assays. For long-  
110 term simulated shade treatment (Figure 1 and S1), various inbred lines were grown  
111 under white light (65.6  $\mu\text{mol}/\text{m}^2/\text{s}$ ) supplied with FR light (10.52  $\mu\text{mol}/\text{m}^2/\text{s}$ , low R:FR),  
112 or R light (50.0  $\mu\text{mol}/\text{m}^2/\text{s}$ , high R:FR) after seed germination. After shade treatment,  
113 scanning electron microscopy (SEM) of sheath and leaf blade tissues were performed  
114 as previously described (Kong et al., 2017).

115 The *Arabidopsis thaliana* wild-type control plants used in this study were ecotype  
116 Columbia-0 (Col-0). The seeds were surface-sterilized with 20% bleach for 20 min and  
117 washed four times with sterile ddH<sub>2</sub>O. After being stratified for two days at 4 °C, the  
118 seeds were germinated on germination medium (GM) plates.

### 119 *RT-qPCR*

120 Total RNA was extracted using an Ultrapure RNA kit (CW BIO, Beijing). The reverse-  
121 transcription reactions were performed using an AMV reverse transcriptase  
122 (Fermentas). The RT-qPCR was performed on a 7500 Fast Real-Time PCR machine  
123 (ABI) using SYBR Real Master Mix (Tiangen, Beijing). Primers used for RT-qPCR are  
124 listed in Table S3.

### 125 *RNA-seq analysis*

126 The cDNA library construction, sequencing, and data analyses were performed as  
127 described previously (Kong et al., 2017). The maize B73 reference genome (AGPv3.22)  
128 were used for mapping the reads. The Cufflinks 2.2.1 package was used to calculate  
129 the gene expression levels with the parameter of reads per kilobase per million

130 mapped reads (RPKM) and detect differentially expressed genes (DEGs) using default  
131 parameters. The false discovery rate (FDR) was used to determine the threshold of  
132 the p-value in multiple tests. A threshold of  $FDR \leq 0.05$  and a fold change  $\geq 2$  were  
133 used to judge the significance of differences in gene expression.

#### 134 *Cluster and functional enrichment analysis*

135 DEGs that were commonly expressed under both FR light and after re-exposure to R  
136 light (Dataset S2) and the expressed transcription factor genes were subjected to  
137 cluster analysis (Dataset S1). The RPKM values (normalized to the maximum of all  
138 RPKM values of the gene in B73 seedlings treated with FR light for 0 h, 1 h or 3 h,  
139 followed by R light for 1 h) were subjected to cluster analysis using the K-Means  
140 Support (KMS) module in the MultiExperiment Viewer (MEV) program.

#### 141 *Plasmid construction and generation of transgenic Arabidopsis plants*

142 To generate transgenic *ZmHB53-OE* lines in the Arabidopsis Col-0 background, the  
143 coding region of *ZmHB53* was PCR-amplified from cDNA of inbred line B73 using the  
144 primers pair *ZmHB53-F* and *ZmHB53-R* (Table S3). Then, *ZmHB53* fragment was  
145 inserted into the *BamHI* and *XbaI* digested *pPZP211-35Spro::3FLAG* binary vector  
146 (Ma et al., 2017) to produce *35Spro::ZmHB53-3FLAG*. More than 20 independent  
147 transgenic lines were selected and verified by RT-qPCR, followed by immunoblot  
148 analysis as described previously (Ma et al., 2016).

## 149 **Results**

### 150 *Low R:FR induces the SAS in maize seedlings*

151 To investigate the effects of shade on maize growth, seedlings of various inbred lines  
152 were grown under white light supplied with FR (R:FR ratio 0.19) or R (R:FR ratio 13.3)  
153 conditions. After simulated shade treatment, the mesocotyl length, leaf length, and  
154 plant height significantly increased in inbred lines B73, Mo17, Huangzao4, Zheng58  
155 and Su115, compared to plants under high R:FR conditions (Fig. 1a, 1b, S1).  
156 Mesocotyl length increased more strongly in inbred B73 (by 17%) and Mo17 (20%),  
157 compared with the other inbred lines (Fig.1b, S1). Moreover, the inbred lines 178 and

158 Q319 were less responsive to simulated shade-induced elongation of mesocotyls and  
159 plant height, compared to the inbred lines B73 and Mo17 (Fig. 1). In addition,  
160 anthocyanin accumulation obviously decreased in the base region of the sheath in all  
161 the tested inbred lines under low R:FR conditions, compared with control plants grown  
162 under high R:FR conditions (Fig.1a, S1a).

163 To investigate the effects of simulated shade on cell elongation in B73, we  
164 observed the epidermal cells of the leaf blade and sheath by SEM. As shown in Figure  
165 1c, cell elongation in the leaf blade increased slightly, while cell elongation in the  
166 sheath increased substantially after shade treatment. To further explore the effects of  
167 supplemental FR on cell elongation, we examined the transcript levels of cell  
168 elongation-related genes in V3 stage B73 and 178 seedlings that were transferred from  
169 white light to FR light for 1 and 3 h, followed by 1 h in red light. The transcript levels of  
170 *XTH8*, *XTH23*, and *EXPB2* were significantly induced by FR light and repressed by R  
171 light in inbred B73, but showed no obvious change in 178 (Fig. 1d), consistent with its  
172 reduced sensitivity to simulated shade treatment in Figure 1a-b.

### 173 *Generation and analysis of RNA-seq data for treated plants*

174 To gain insight into the molecular regulatory mechanism of the shade response in  
175 maize, we conducted global RNA-seq of B73 seedlings at the V3 stage treated with  
176 FR light for 0 h (F0), 1 h (F1), or 3 h (F3), followed by R light for 1 h (R1) (short-term  
177 shading treatment). Using paired-end Illumina sequencing, we generated sequences  
178 from eight libraries (four time points with two biological replicates), producing  
179 approximately 1.9 billion high-quality reads, 95% of which uniquely mapped to the B73  
180 reference genome, version 3. The distribution of reads was 75.8% in exons, 9.3% in  
181 introns, and 11.2% in intergenic genomic regions (Table S1). Comparisons of the  
182 biological replicates showed that their expression values were highly correlated  
183 (average  $R^2 = 0.963$ , Fig. S2), indicating that the results of biological replicates in this  
184 study are highly reproducible. To reduce the influence of transcriptional noise, genes  
185 from the B73 filtered gene set (FGS) were included for analysis only if their RPKM  
186 values were  $\geq 1$ . In total, 22,479 genes were expressed under at least one condition,

187 including 18,968 (84.5%) genes commonly expressed among all four conditions (Fig.  
188 2a, Dataset S1).

189 To verify the quality of RNA-seq data, we performed RT-qPCR analyses of 48  
190 transcripts, revealing a high correlation ( $R^2 = 0.587$ ) between the RNA-seq and RT-  
191 qPCR data (Fig. S3b). As expected, *ZmphyA1*, *ZmphyB1*, *ZmphyB2*, *ZmphyC1*, and  
192 *ZmphyC2* were significantly induced by FR (Fig. S3a). *ZmHY5* was strongly down-  
193 regulated by FR. Additionally, multiple genes encoding proteins involved in the light  
194 reactions in photosynthesis, such as *ZmLHCB1*, *ZmPSBA*, *ZmPSBQ*, and *ZmPSB28*  
195 were downregulated by FR (Fig. S3a).

196 Further, we identified 327, 591, and 195 DEGs between F0 and F1 (F1 vs. F0),  
197 F0 and F3 (F3 vs. F0) and F3 and R1 (R1 vs. F3), respectively (Fig. 2b and c, Dataset  
198 S2). Among these, 111 genes were common between F1 vs. F0, and F3 vs. F0,  
199 including three genes showing opposite expression patterns. Therefore, after  
200 excluding these three oppositely expressed genes, a total of 804 FR-regulated DEGs  
201 were identified (Fig. 2b). Interestingly, among the 87 common DEGs between FR-  
202 regulated, and red-regulated (R1 vs. F3), 80 (92%) genes showed opposite expression  
203 patterns, suggesting that most of the effects of FR light on gene expression can be  
204 reversed by subsequent treatment with R light (Fig. 2c). All these DEGs (912 genes)  
205 were selected as putative conserved genes important for the SAS in maize.

#### 206 *Dynamics of gene expression during the SAS in maize*

207 To better understand the regulatory network of the SAS in maize, we further grouped  
208 these 912 genes into 10 clusters (C1–C10) based on their expression patterns and  
209 then subjected to MapMan functional enrichment analysis (Fig. 2c). Among clusters  
210 (C1–C3) with reduced expression by FR, the most highly enriched categories included  
211 genes encoding proteins that mediate the light reactions, sucrose synthesis, and  
212 secondary metabolic pathways (Fig. 2e). For example, most of the anthocyanin  
213 biosynthesis related genes, including *CHS*, *CHI*, *F3H*, *DFR*, and *ANS* were highly  
214 downregulated by FR (Fig. S4), consistent with the reduced anthocyanin accumulation  
215 in shade-treated plants (Fig. 1a).



216 Among clusters of genes whose expression was induced by FR (C4–C10), the  
217 most highly enriched categories included genes encoding proteins involved in cell wall  
218 modification, degradation of starch and sucrose, hormone metabolism, and various  
219 signal pathways, suggesting they might play important roles in early responses to  
220 shade in maize. For example, genes related to auxin biosynthesis (e.g., *ZmYUC5* and  
221 *ZmTAA1*), and ethylene signal transduction (e.g., *ZmERF7*) were significantly induced  
222 by FR and downregulated by subsequent R treatment (Fig. 2e, S5). Interestingly, most  
223 of the alterations in expression (up- or downregulation) induced by FR were reversed  
224 by subsequent R treatment in most clusters, except for C10, which was enriched for  
225 genes involved in vitamin metabolism, protein targeting, and signaling. All these results  
226 are consistent with the regulatory network controlling the SAS in Arabidopsis (Li et al.,  
227 2011), suggesting that the regulatory mechanism of the SAS is evolutionarily  
228 conserved between monocots and dicots.

#### 229 *Transcription factors play important roles in the maize SAS*

230 Of the 3,316 maize transcription factor genes identified in the Plant Transcription  
231 Factor Database (<http://plantfdb.cbi.pku.edu.cn/>), 1,353 (41%) were commonly  
232 expressed under all four treatment conditions (Dataset S1). These genes were further  
233 classified into five groups based on their expression patterns (G1–G5, including 262,  
234 212, 450, 191, and 238 genes, respectively; Fig. 3a). Shade-downregulated  
235 transcription factors were grouped into G1 and G2, including the HD-ZIP (21/43  
236 expressed HD-ZIPs were included in G1 and G2) and MYB (44/124) transcription  
237 factors (Fig. 3b). Early shade-induced transcription factors were grouped into G3,  
238 which was significantly enriched for bHLH (41/109), ERF (46/92) and GRAS (21/48)  
239 family members (Fig. 3b, Dataset S1). Some bHLH family genes, including members  
240 of the PIF sub-family (*ZmPIF3*, *ZmPIF5*, and *PIF-like*) were rapidly induced by FR  
241 treatment. In addition, atypical *PIF* family genes, including *ZmHFR1*, *ZmPAR1*,  
242 *ZmPAR2* and *ZmPIL1*, were rapidly induced by shade and might play a negative role  
243 in the SAS (Dataset S1). Late shade-induced transcription factors were grouped in G4  
244 and G5, and were significantly enriched for ARF (15/24) and HB/other (9/15) family

245 members.

#### 246 *Core genes involved in regulating the SAS*

247 To identify the important regulators of the shade response, we first listed the 226 genes  
248 overlapping in our DEG list (912, Dataset S2) and Wang's DEG list (1105, Wang et al.,  
249 2016), eliminated the photosynthesis, secondary metabolism, stress, nucleotide  
250 metabolism, and function unknown genes from this list, added three genes, *ZmGT1*  
251 (*Grassy tillers1*), *ZmTB1* (*Teosinte branched1*), and *ZmVT2*, which have already been  
252 shown to play important roles in maize SAS (Doebley et al., 1997; Sheehan et al., 2007;  
253 Phillips et al., 20011; Whipple et al., 2011), and identified 93 core genes for the shade  
254 response (Table1, S2). Most of these genes were significantly regulated by shade  
255 treatment. In addition to *ZmGT1*, *ZmTB1*, and *ZmVT2*, *ZmphyB1* and *ZmphyB2* have  
256 also been proved to participate in maize SAS (Sheehan et al., 2007). The other core  
257 shade-responsive genes have not previously been shown to directly regulate the SAS  
258 in maize, but are related to light signaling, hormone metabolism and signal  
259 transduction, regulation of transcription, cell wall modification, protein metabolism and  
260 so on (Table 1). For example, multiple plant hormone-related genes including *IAAs*,  
261 *SAURs* and *GH3.1*, *GA1*, *GA5*, *GA2ox1*, *GA2ox8*, *CKX6*, *ACO1*, *EIN4* and *ERFs* were  
262 identified, suggesting that they may play crucial roles in the SAS in maize (Table 1).  
263 Interestingly, we identified 7 *BBXs* as core genes for SAS regulation (Table 1, S2). For  
264 example, *ZmBBX20* was upregulated 2.9-fold (F1 vs. F0) and 12.7-fold (F3 vs. F0) in  
265 response to shade treatment in the current study, and 2.5-fold (1 h vs. 0h), 2.1-fold (3  
266 h vs. 0 h) and 2.9-fold (6 h vs. 0 h) in the previous study (Wang et al., 2016).

#### 267 *ZmHD-ZIP proteins act as regulators of the SAS*

268 Research in *Arabidopsis* has shown that HD-ZIP transcription factors modulate the  
269 SAS (Sorin et al. 2009). In our RNA-seq data, many HD-ZIP family genes were up- or  
270 downregulated by shade, therefore, this transcription factor family was selected for  
271 further analysis (Fig. 4a). Phylogenetic analysis of this family genes in *Arabidopsis* and  
272 maize revealed that these genes were classified into the I, II, III and IV subfamilies (Fig.  
273 4b). Interestingly, one-third of type I HD-ZIP and all the type II HD-ZIP genes were up

274 regulated, while two-thirds type I HD-ZIP genes were down regulated by FR (Fig. 4a),  
275 indicating that various members of this transcription factor family (for example type I  
276 and II HD-ZIP genes) might play opposite roles in the shade response. Consistent with  
277 the results of RNA-seq, qPCR analyses revealed that type II HD-ZIPs, including  
278 *ZmHB4*, *ZmHB53*, *ZmHB59*, *ZmHB78*, and *ZmHB86*, were strongly induced by FR,  
279 and subsequently suppressed by R light; by contrast, type I HD-ZIPs, such as *ZmHB34*,  
280 *ZmHB66*, and *ZmHB70*, were slightly reduced by FR and induced by R light (Fig. 4c).  
281 These results demonstrate that both the type I and II HD-ZIP subfamily members might  
282 play more important roles in the responses to shade signals.

283 We further measured the expression levels of these HD-ZIP genes in the B73 and  
284 178 inbred lines under simulated shade conditions. As shown in Figure 4d, *ZmHB43*,  
285 *ZmHB53*, *ZmHB78* and *ZmHB127* were induced by shade in both inbred B73 and 178,  
286 while *ZmHB34*, *ZmHB66*, and *ZmHB70* showed opposite expression patterns in these  
287 inbred lines under shade treatment, suggesting these genes may contribute to the  
288 differential response to shade between the B73 and 178 inbred lines.

#### 289 *ZmHB53 can affect the shade response in maize*

290 To further investigate the roles of HD-ZIPs in the shade response, we focused on  
291 *ZmHB53* (GRMZM2G044752), a homolog of *ATHB4* which is essential in shade  
292 response and leaf development in Arabidopsis (Sorin et al. 2009). To investigate  
293 whether *ZmHB53* affects leaf morphogenesis and shade responses, we  
294 overexpressed a FLAG-tagged version of *ZmHB53* (*ZmHB53-3Flag*) under the control  
295 of the constitutive 35S promoter in the Arabidopsis Col-0 background. Three  
296 independent transgenic *ZmHB53* overexpression lines (*OE5*, *OE6*, and *OE8*) were  
297 selected based RT-qPCR and western-blotting, and then subjected to further  
298 physiological analysis (Fig. S5a).

299 All three lines exhibited a slight SAS, including narrow rosette leaves and early  
300 flowering time, compared with wild-type Col-0 plants under long-day (LD, 16-hour  
301 light/8-hour dark) conditions (Fig. 5a–b, 5d–e). Interestingly, the transgenic lines had  
302 more branches and reduced plant height compared to wild type at the mature stage,

303 representing a lessened response to shade treatment, compared with wild-type control  
304 plants (Fig. 5c, 5e), indicating that *ZmHB53* can affect SAS in Arabidopsis via a  
305 complex regulatory mechanism. However, in seedlings grown under dark, white, and  
306 low R/FR light conditions, Arabidopsis *ZmHB53* overexpression lines showed no  
307 significant differences from wild-type control plants (Fig. S5), suggesting that *ZmHB53*  
308 mainly functions at the mature stage.

309 Next, we examined the transcript levels of genes that respond rapidly to shade  
310 treatment in the *ZmHB53*-overexpressing lines via RT-qPCR. Under white-light (R:FR  
311 7.8) conditions, the transcript levels of well-known shade-responsive genes including  
312 *HFR1*, *PAR1*, *PIL1*, and *EXP2*, all significantly increased in the Arabidopsis *ZmHB53*-  
313 overexpressing lines, compared with wild-type Col-0 control plants (Fig. 5f). After  
314 simulated shade treatment (W+FR), the expression of *HFR1*, *PAR1*, and *PIL1*, were  
315 significantly upregulated in Col-0 and *ZmHB53* overexpression lines, compared with  
316 control plants under white light conditions (Fig. 5f–g). All these results indicate that  
317 overexpressing *ZmHB53* enhances the transcript levels of shade-response genes in  
318 Arabidopsis.

319

## 320 Discussion

321 Light is one of the essential factors determining yield potential in the modern high-  
322 density cultivation of crop plants. In most plant species showing shade avoidance  
323 response, changes in light quantity and quality cause morphological responses  
324 including elongated stems and petioles, and more erect leaf angle; these responses  
325 increase leaf vertical inclination and help the plant compete for light (Zhu et al., 2014;  
326 Bongers et al., 2018). Here, we found that the maize inbred lines 178 and Q319  
327 exhibited less-pronounced responses to simulated shade treatment, compared with  
328 inbred lines B73 and Mo17 (Fig.1a-b). B73 maize seedlings under simulated shade  
329 conditions showed typical symptoms of the SAS, such as elongated mesocotyls, stems,  
330 and leaves, and reduced accumulation of anthocyanin (Fig. 1a–b). Consistent with this,  
331 cytological, qPCR and RNA-seq analyses showed that simulated shade treatment

332 induced the transcription levels of cell elongation-related genes and promoted cell  
333 elongation in leaf blades and sheaths (Fig. 1c–d).

334 Phytochrome signaling pathways play a conserved role in the low R:FR induced  
335 shade response in both maize and Arabidopsis (Lee et al., 2017). Arabidopsis PIF4,  
336 PIF5 and PIF7 act as the downstream signal transduction components of multiple  
337 photoreceptors (including phytochromes and cryptochromes) and play crucial roles in  
338 shade responses (Lorrain et al., 2008; Leivar et al., 2011; Li et al., 2012). Here,  
339 *ZmphyA1*, *ZmphyB1*, *ZmphyB2*, and five *PIF* family genes were all upregulated by FR,  
340 suggesting that they may play important roles in shade responses. Consistent with this,  
341 our previously study showed that the over-expression of *ZmPIF4* and *ZmPIF5* causes  
342 a constitutive shade avoidance response in Arabidopsis, indicating that they might play  
343 essential roles in shade responses in maize (Shi et al. 2018).

344 A reduction in the outgrowth of axillary buds is one of the typical morphological  
345 changes of the shade avoidance response. The Arabidopsis TCP (TEOSINTE  
346 BRANCHED 1, CYCLOIDEA, PCF) type transcription factor BRANCHED 1 (*BRC1*)  
347 directly binds to and activates the transcription of a group of HD-ZIP I transcription  
348 factor genes, including *HB21*, *HB40*, and *HB53*, thus preventing constitutive outgrowth  
349 of branches (Gonzalez-Grandio et al., 2017). Maize *TB1* is a homolog of *BRC1*, and  
350 negatively regulates the outgrowth of axillary buds (Doebley et al., 1997). Maize *GT1*,  
351 encoding an HD-ZIP I family member, is one of the downstream targets of *TB1* and  
352 represses the outgrowth of lateral buds (Whipple et al., 2011). Therefore, it appears  
353 that the genetic module involving the *BRC1/TB1* and HD-ZIP transcription factors is  
354 evolutionarily conserved in dicots and monocots, where it prevents branching under  
355 light-limiting conditions. Interestingly, the Arabidopsis *ZmHB53* (HD-ZIP II)  
356 overexpression lines showed more branches than the wild-type control plant, which  
357 contrasts with the phycological function of maize *GT1* (Fig. 5). Therefore, we  
358 hypothesized that HD-ZIP transcription factors, for example HD-ZIP I and II sub-family,  
359 may play negative and positive roles in regulating the outgrowth of axillary buds,  
360 respectively, like the functions of bHLH type transcription factors in SAS, such as the  
361 positive roles of PIF4 and PIF5, and the negative roles of HFR1, PAR1, and PAR2 in

362 the shade response in Arabidopsis. This is also consistent with the opposite expression  
363 trends of type I and II HD-ZIP genes in response to shade in maize (Fig. 4a).

364 In summary, the monocotyledonous plant maize and the dicotyledonous plant  
365 Arabidopsis share a number of morphological and physiological responses in their  
366 shade responses. When plants are exposed to shade conditions, photoreceptor  
367 systems perceive a reduction of PAR, low ratio of R:FR, as well as low blue light, and  
368 subsequently activate a downstream network of various interacting transcriptional  
369 regulators and hormones to adjust plant growth and development to increase the  
370 plant's ability to compete for light (Fig. S6). Based on this model, three different  
371 strategies could be developed to increase the ability of maize to compete for light and  
372 minimize the negative effects of the SAS. In the upper regulatory layer, one strategy  
373 could involve modulating the expression levels or activities of photoreceptor genes  
374 such as *ZmphyA1*, *ZmphyA2*, *ZmphyB1*, and *ZmphyB2*, as they directly respond to  
375 dynamic environmental light changes. At the middle regulatory layer, another strategy  
376 could modify the expression of important regulators of the SAS, such as *ZmPIF4*,  
377 *ZmPIF5*, *ZmHFR1* and *ZmHB53*. In the downstream regulatory layer, a third strategy  
378 could modify the expression levels of many SAS-related genes, including those directly  
379 involved in cell elongation, hormone synthesis, or signaling transduction, such as  
380 *ZmTAA1* and *ZmYUC5*. Finally, our study identified a core set of shade-responsive  
381 genes, which expands the regulatory network of shade responses and provides a  
382 useful resource for maize genetics and breeding.

383

384 **Supplemental Information**

385 Supplemental information is available online.

386 Fig. S1. The phenotype of maize plants grown under high or low R:FR conditions.

387 Fig. S2. Correlation between biological replicates.

388 Fig. S3. Verification of RNA-seq results by RT-qPCR.

389 Fig. S4. Expression analysis of genes involved in anthocyanin biosynthesis in maize  
390 by RNA-seq.

391 Fig. S5. Identification of *ZmHB53* overexpression transgenic plants and the response  
392 of seedlings to shade.

393 Fig. S6. Model of the putative regulatory network of the early shade response in maize.

394 Table S1. RNA-seq data analysis.

395 Table S2. Core responsible genes involved in regulating the shade response in maize.

396 Table S3. Primers used in this study.

397 Dataset S1. Genes expressed during the shade response in maize.

398 Dataset S2. Differentially expressed genes during the shade response in maize.

399

400 **Acknowledgments**

401 This work was supported by grants from the State Key Basic Research and  
402 Development Program of China (2014CB147301 and 2016YFD0101003), the National  
403 Key Research and Development Plan of China (2017YFD0301001 and  
404 2018YFD0300603), the National Natural Science Foundation of China (31701434),  
405 Funds of Shandong “Double Tops” Program (to GL) and the State Key Laboratory of  
406 Crop Biology (DXKT201706).



407 **References**

- 408 **Ballaré CL, Pierik R.** 2017. The shade-avoidance syndrome: multiple signals and ecological  
409 consequences. *Plant, Cell and Environment* **40**, 2530-2543.
- 410 **Beall FD, Yeung EC, Pharis RP.** 1996. Far-red light stimulates internode elongation, cell division, cell  
411 elongation, and gibberellin levels in bean. *Revue Canadienne De Botanique* **74**, 743-752.
- 412 **Bongers FJ, Pierik R, Anten NPR, Jochem B, Evers JB.** 2018. Subtle variation in shade avoidance  
413 responses may have profound consequences for plant competitiveness. *Annals of Botany* **121**,  
414 863-873.
- 415 **Bou-Torrent J, Galstyan A, Gallemi M, Cifuentes-Esquivel N, Molina-Contreras MJ, Salla-  
416 Martret M, Jikumaru Y, Yamaguchi S, Kamiya Y, Martinez-Garcia JF.** 2014. Plant  
417 proximity perception dynamically modulates hormone levels and sensitivity in Arabidopsis.  
418 *Journal of Experimental Botany* **65**, 2937-2947.
- 419 **Casal JJ.** 2013. Photoreceptor signaling networks in plant responses to shade. *Annual Review of Plant  
420 Biology* **64**, 403-427.
- 421 **Castillon A, Shen H, Huq E.** 2007. Phytochrome interacting factors: central players in phytochrome-  
422 mediated light signaling networks. *Trends in Plant Science* **12**, 514-521.
- 423 **Chen M, Chory J.** 2011. Phytochrome signaling mechanisms and the control of plant development.  
424 *Trends in Cell Biology* **21**, 664-671.
- 425 **Cui H, Camberato JJ, Jin L, Zhang J.** 2015. Effects of shading on spike differentiation and grain yield  
426 formation of summer maize in the field. *International Journal of Biometeorology* **59**, 1189-1200.
- 427 **Doebley J, Stec A, Hubbard L.** 1997. The evolution of apical dominance in maize. *Nature* **386**, 485-  
428 488.
- 429 **Franklin KA.** 2008. Shade avoidance. *New Phytologist* **179**, 930-944.
- 430 **Gangappa SN, Botto JF.** 2014. The BBX family of plant transcription factors. *Trends in Plant Science*  
431 **19**, 460-470.
- 432 **Gonzalez-Grandio E, Pajoro A, Franco-Zorrilla JM, Tarancon C, Immink RG, Cubas P.** 2017.  
433 Abscisic acid signaling is controlled by a BRANCHED1/HD-ZIP I cascade in Arabidopsis  
434 axillary buds. *Proceedings of the National Academy of Sciences of the United States of America*  
435 **114**, E245-e254.
- 436 **Hornitschek P, Kohnen MV, Lorrain S, et al.** 2012. Phytochrome interacting factors 4 and 5 control  
437 seedling growth in changing light conditions by directly controlling auxin signaling. *The Plant  
438 Journal* **71**, 699-711.
- 439 **Hornitschek P, Lorrain S, Zoete V, Michielin O, Fankhauser C.** 2009. Inhibition of the shade  
440 avoidance response by formation of non - DNA binding bHLH heterodimers. *The Embo  
441 Journal* **28**, 3893.
- 442 **Jin M, Liu X, Jia W, et al.** 2018. *ZmCOL3*, a CCT gene represses flowering in maize by interfering with  
443 the circadian clock and activating expression of *ZmCCT*. *Journal of Integrative Plant Biology*  
444 **60**, 465-480
- 445 **Kebrom TH, Mullet JE.** 2016. Transcriptome profiling of tiller buds provides new insights into PhyB  
446 regulation of tillering and indeterminate growth in Sorghum. *Plant Physiology* **170**, 2232-2250.
- 447 **Keuskamp DH, Sasidharan R, Pierik R.** 2010. Physiological regulation and functional significance of  
448 shade avoidance responses to neighbors. *Plant Signaling & Behavior* **5**, 655-662.
- 449 **Kircher S, Kozma-Bognar L, Kim L, Adam E, Harter K, Schafer E, Nagy F.** 1999. Light quality-  
450 dependent nuclear import of the plant photoreceptors phytochrome A and B. *The Plant Cell* **11**,



- 451 1445-1456.
- 452 **Kong F, Zhang T, Liu J, et al.** (2017) Regulation of leaf angle by auricle development in Maize.  
453 *Molecular Plant* **10**, 516-519.
- 454 **Kumar I, Swaminathan K, Hudson K, Hudson ME.** 2016. Evolutionary divergence of phytochrome  
455 protein function in *Zea mays* PIF3 signaling. *Journal of Experimental Botany* **67**, 4231-4240.
- 456 **Kurepin LV, Emery RJ, Pharis RP, Reid DM.** 2007. Uncoupling light quality from light irradiance  
457 effects in *Helianthus annuus* shoots: putative roles for plant hormones in leaf and internode  
458 growth. *Journal of Experimental Botany* **58**, 2145-2157.
- 459 **Lee N, Choi G.** 2017. Phytochrome-interacting factor from Arabidopsis to liverwort. *Current Opinion*  
460 *in Plant Biology* **35**, 54-60.
- 461 **Leivar P, Monte E, Oka Y, Liu T, Carle C, Castillon A, Huq E, Quail PH.** 2008. Multiple  
462 phytochrome-interacting bHLH transcription factors repress premature seedling  
463 photomorphogenesis in darkness. *Current Biology* **18**, 1815-1823.
- 464 **Leivar P, Quail PH.** 2011. PIFs: pivotal components in a cellular signaling hub. *Trends in Plant Science*  
465 **16**, 19-28.
- 466 **Li J, Li G, Wang H, Wang Deng, X.** 2011. Phytochrome signaling mechanisms. *Arabidopsis Book* **9**,  
467 e0148.
- 468 **Li L, Ljung K, Breton G, et al.** 2012. Linking photoreceptor excitation to changes in plant architecture.  
469 *Genes & Development* **26**, 785-790.
- 470 **Liu H, Yang C, Li L.** 2016. Shade-induced stem elongation in rice seedlings: implication of tissue-  
471 specific phytohormone regulation. *Journal of Integrative Plant Biology* **58**, 614-617.
- 472 **Lorrain S, Allen T, Duek PD, Whitelam GC, Fankhauser C.** 2008. Phytochrome-mediated inhibition  
473 of shade avoidance involves degradation of growth-promoting bHLH transcription factors. *The*  
474 *Plant Journal* **53**, 312-323.
- 475 **Ma L, Xue N, Fu X, Zhang H, Li G.** 2017. Arabidopsis thaliana FAR-RED ELONGATED  
476 HYPOCOTYLS3 (FHY3) and FAR-RED-IMPAIRED RESPONSE1 (FAR1) modulate starch  
477 synthesis in response to light and sugar. *New Phytologist* **213**, 1682-1696.
- 478 **Maddoni G, Otegui ME, Cirilo AG.** 2001. Plant population density, row spacing and hybrid effects  
479 on maize canopy architecture and light attenuation. *Field Crops Research* **71**, 183-193.
- 480 **Page E, Tollenaar M, Lee E, Lukens L, Swanton C.** 2010. Shade avoidance: an integral component of  
481 crop-weed competition. *Weed Research* **50**, 281-288.
- 482 **Pfeiffer A, Shi H, Tepperman JM, Zhang Y, Quail PH.** 2014. Combinatorial complexity in a  
483 transcriptionally centered signaling hub in Arabidopsis. *Molecular Plant* **7**, 1598-1618.
- 484 **Phillips KA, Skirpan AL, Liu X, Christensen A, Slewinski TL, Hudson C, Barazesh S, Cohen JD,**  
485 **Malcomber S, McSteen P.** 2011. *Vanishing tassel 2* encodes a grass-specific tryptophan  
486 aminotransferase required for vegetative and reproductive development in maize. *The Plant Cell*  
487 **23**, 550-566.
- 488 **Pignon CP, Jaiswal D, McGrath JM, Long SP.** 2017. Loss of photosynthetic efficiency in the shade.  
489 An Achilles heel for the dense modern stands of our most productive C4 crops? *Journal of*  
490 *Experimental Botany* **68**, 335-345.
- 491 **Reed JW, Nagpal P, Poole DS, Furuya M, Chory J.** 1993. Mutations in the gene for the red/far-red  
492 light receptor phytochrome B alter cell elongation and physiological responses throughout  
493 Arabidopsis development. *The Plant Cell* **5**, 147-157.
- 494 **Robson P, Whitelam GC, Smith H.** 1993. Selected components of the shade-avoidance syndrome are

- 495 displayed in a normal manner in mutants of *Arabidopsis thaliana* and *Brassica rapa* deficient  
496 in phytochrome B. *Plant Physiology* **102**, 1179-1184.
- 497 **Roigvillanova I, Bou J, Sorin C, Devlin PF, Martínezgarcía JF.** 2006. Identification of primary target  
498 genes of phytochrome signaling. Early transcriptional control during shade avoidance responses  
499 in *Arabidopsis*. *Plant Physiology* **141**, 85-96.
- 500 **Sharwood RE, Sonawane BV, Ghannoum O.** 2014. Photosynthetic flexibility in maize exposed to  
501 salinity and shade. *Journal of Experimental Botany* **65**, 3715-3724.
- 502 **Sheehan MJ, Kennedy LM, Costich DE, Brutnell TP.** 2007. Subfunctionalization of PhyB1 and  
503 PhyB2 in the control of seedling and mature plant traits in maize. *The Plant Journal* **49**, 338-  
504 353.
- 505 **Shi Q, Zhang H, Song X, Jiang Y, Liang R, Li G.** 2018. Functional characterization of the maize  
506 phytochrome-interacting factors PIF4 and PIF5. *Frontiers in Plant Science* **8**, 2273.
- 507 **Sorin C, Salla-Martret M, Bou-Torrent J, Roig-Villanova I, Martínez-García JF.** 2009. ATHB4, a  
508 regulator of shade avoidance, modulates hormone response in *Arabidopsis* seedlings. *The Plant*  
509 *Journal* **59**, 266-277.
- 510 **Takeda T, Suwa Y, Suzuki M, Kitano H, Ueguchi-Tanaka M, Ashikari M, Matsuoka M, Ueguchi**  
511 **C.** 2003. The *OsTBI* gene negatively regulates lateral branching in rice. *The Plant Journal* **33**,  
512 513-520.
- 513 **Wang H, Wu G, Zhao B, Wang B, Lang Z, Zhang C, Wang H.** 2016. Regulatory modules controlling  
514 early shade avoidance response in maize seedlings. *BMC Genomics* **17**, 269.
- 515 **Wang H, Zhang Z, Li H, Zhao X, Liu X, Ortiz M, Lin C, Liu B.** 2013. CONSTANS-LIKE 7 regulates  
516 branching and shade avoidance response in *Arabidopsis*. *Journal of Experimental Botany* **64**,  
517 1017-1024.
- 518 **Whipple CJ, Kebrom TH, Weber AL, Yang F, Hall D, Meeley R, Schmidt R, Doebley J, Brutnell**  
519 **TP, Jackson DP.** 2011. *Grassy tillers1* promotes apical dominance in maize and responds to  
520 shade signals in the grasses. *Proceedings of the National Academy of Sciences of the United*  
521 *States of America* **108**, E506-512.
- 522 **Zhang Y, Mayba O, Pfeiffer A, Shi H, Tepperman JM, Speed TP, Quail PH.** 2013. A quartet of PIF  
523 bHLH factors provides a transcriptionally centered signaling hub that regulates seedling  
524 morphogenesis through differential expression-patterning of shared target genes in *Arabidopsis*.  
525 *PLoS Genetics* **9**, e1003244.
- 526 **Zhu J, Vos J, van der Werf W, van der Putten PEL, Evers JB.** 2014. Early competition shapes maize  
527 whole-plant development in mixed stands. *Journal of Experimental Botany* **65**, 641-653.
- 528  
529  
530  
531  
532  
533  
534  
535

**Table 1. Core responsible genes involved in regulating the SAS in maize.**

| Gene ID       | Gene name       | F0    | F1    | F3    | R1    | Function              | Homologous | sha_0h | sha_1h | sha_3h | sha_6h |
|---------------|-----------------|-------|-------|-------|-------|-----------------------|------------|--------|--------|--------|--------|
| GRMZM2G157727 | <i>PHYA1</i>    | 67.86 | 66.74 | 92.78 | 98.20 |                       | AT1G09570  | 11.27  | 13.05  | 22.31  | 26.31  |
| GRMZM2G181028 | <i>PHYA2</i>    | 18.04 | 17.11 | 28.16 | 35.46 |                       | AT1G09570  | 4.64   | 6.54   | 16.06  | 21.57  |
| GRMZM2G124532 | <i>PHYB1</i>    | 11.40 | 17.86 | 35.34 | 34.59 |                       | AT2G18790  | 7.42   | 10.24  | 14.09  | 15.58  |
| GRMZM2G057935 | <i>PHYC1</i>    | 7.59  | 13.02 | 16.97 | 18.75 |                       | AT5G35840  | 13.52  | 16.15  | 21.70  | 26.56  |
| GRMZM2G137046 | <i>HYS</i>      | 27.90 | 16.12 | 9.37  | 12.25 | light signal          | AT5G11260  | 14.86  | 10.84  | 15.36  | 12.65  |
| GRMZM2G016756 | <i>PIF1</i>     | 1.87  | 1.38  | 5.01  | 12.58 |                       | AT2G20180  | 7.88   | 3.09   | 5.92   | 5.49   |
| GRMZM2G107945 | <i>FKF1</i>     | 2.46  | 6.73  | 22.40 | 34.81 |                       | AT1G68050  | 0.41   | 1.09   | 7.21   | 42.68  |
| GRMZM2G172506 | <i>NPY5</i>     | 10.49 | 24.22 | 27.95 | 31.63 |                       | AT4G37590  | 8.60   | 10.87  | 19.53  | 29.57  |
| GRMZM2G176506 | <i>PLPB</i>     | 7.55  | 11.82 | 20.13 | 17.42 |                       | AT2G02710  | 2.05   | 4.13   | 7.28   | 10.46  |
| GRMZM2G127308 | <i>VT2/TAA1</i> | 8.05  | 15.64 | 32.64 | 10.47 |                       | AT4G24670  |        |        |        |        |
| GRMZM2G160005 | <i>IAA22</i>    | 1.91  | 4.88  | 10.12 | 10.28 | auxin                 | AT1G19220  | 10.11  | 14.12  | 18.63  | 23.67  |
| GRMZM2G159285 | <i>IAA16</i>    | 22.51 | 24.54 | 52.64 | 57.21 |                       | AT3G04730  | 74.31  | 87.72  | 164.6  | 258.3  |
| GRMZM2G382569 | <i>SRG1</i>     | 29.84 | 35.33 | 84.30 | 67.89 |                       | AT1G17020  | 3.51   | 3.50   | 6.58   | 12.32  |
| GRMZM2G055180 | <i>ERF9</i>     | 12.33 | 33.65 | 21.19 | 22.60 | ethylene              | AT5G47220  | 11.69  | 17.49  | 14.88  | 17.51  |
| GRMZM2G111415 | <i>ERF10</i>    | 7.37  | 18.71 | 22.28 | 11.27 |                       | AT5G25190  | 5.69   | 5.44   | 4.69   | 5.08   |
| GRMZM2G177104 | <i>GA2ox8</i>   | 0.55  | 1.94  | 4.33  | 3.23  | GA                    | AT4G21200  | 0.02   | 0.04   | 0.22   | 0.08   |
| GRMZM2G368411 | <i>GA20ox1</i>  | 2.78  | 5.13  | 12.54 | 3.07  |                       | AT4G25420  | 3.29   | 11.48  | 20.89  | 28.73  |
| GRMZM2G005624 | <i>GT1</i>      | 7.24  | 3.65  | 3.31  | 2.09  |                       | AT4G36740  |        |        |        |        |
| AC233950.1    | <i>TBI</i>      | 1.09  | 0.22  | 0     | 0.16  |                       | AT3G18550  |        |        |        |        |
| GRMZM2G044752 | <i>HB53</i>     | 0.45  | 2.74  | 2.72  | 0.96  |                       | AT2G44910  | 3.09   | 10.16  | 9.19   | 7.06   |
| GRMZM2G159996 | <i>BBX13</i>    | 7.75  | 14.81 | 27.37 | 33.38 |                       | AT1G28050  | 3.95   | 5.24   | 7.57   | 13.88  |
| GRMZM2G110541 | <i>BBX22</i>    | 0.59  | 1.74  | 7.37  | 3.80  |                       | AT4G39070  | 2.43   | 5.90   | 4.99   | 4.64   |
| GRMZM2G018876 | <i>BBX24</i>    | 38.82 | 49.08 | 139.4 | 102.7 |                       | AT1G06040  | 128.5  | 161.5  | 277.1  | 340.5  |
| GRMZM2G057955 | <i>MYB3</i>     | 13.52 | 27.32 | 160.0 | 36.41 |                       | AT4G01060  | 31.06  | 78.03  | 112.3  | 118.7  |
| GRMZM2G114503 | <i>RL6</i>      | 166.3 | 103.0 | 36.15 | 27.05 |                       | AT1G75250  | 39.91  | 25.22  | 14.75  | 12.70  |
| GRMZM2G145041 | <i>RVE1</i>     | 28.41 | 11.63 | 13.97 | 13.22 | transcription factors | AT5G17300  | 21.40  | 13.76  | 10.30  | 3.32   |
| GRMZM2G150260 | <i>RL1</i>      | 18.58 | 6.52  | 0.99  | 2.04  |                       | AT4G39250  | 16.41  | 8.73   | 3.67   | 2.75   |
| GRMZM2G042895 | <i>bHLH116</i>  | 5.73  | 40.08 | 10.36 | 8.07  |                       | AT4G29930  | 0.18   | 1.19   | 0.43   | 0.30   |
| GRMZM2G445634 | <i>JAZ1</i>     | 9.56  | 33.31 | 12.63 | 8.91  |                       | AT1G19180  | 5.56   | 6.64   | 4.55   | 5.29   |
| GRMZM2G138455 | <i>CDF2</i>     | 21.34 | 12.39 | 9.72  | 14.31 |                       | AT5G39660  | 10.15  | 7.77   | 5.75   | 2.67   |
| GRMZM2G148453 | <i>TOC1</i>     | 0.89  | 2.63  | 8.60  | 12.53 |                       | AT5G61380  | 0.58   | 0.33   | 1.73   | 4.63   |
| GRMZM2G367834 | <i>PRR5</i>     | 4.39  | 5.26  | 12.09 | 16.41 |                       | AT5G24470  | 1.61   | 2.20   | 8.96   | 16.48  |
| GRMZM2G081949 | <i>REM4</i>     | 52.17 | 169.8 | 183.7 | 187.3 |                       | AT2G41870  | 41.31  | 58.88  | 52.43  | 60.92  |
| GRMZM2G086876 | <i>AHL9</i>     | 6.77  | 12.18 | 13.84 | 12.06 |                       | AT2G45850  | 13.85  | 14.80  | 18.59  | 29.35  |
| GRMZM2G071042 | <i>SAP5</i>     | 44.10 | 88.40 | 143.2 | 76.58 |                       | AT3G12630  | 41.14  | 47.85  | 52.63  | 48.19  |
| GRMZM2G094990 | <i>EXPB1</i>    | 120.0 | 93.09 | 103.4 | 50.16 | cell wall             | AT1G65680  | 129.5  | 113.3  | 67.47  | 38.84  |
| GRMZM2G005840 | <i>XERICO</i>   | 82.40 | 128.9 | 130.3 | 67.80 | protein degradation   | AT2G04240  | 15.86  | 39.81  | 55.30  | 71.83  |
| GRMZM2G390436 | <i>DAFL1</i>    | 1.68  | 4.97  | 10.86 | 8.04  |                       | AT3G10910  | 1.88   | 2.27   | 4.39   | 8.14   |

536 Note: Sha\_0h, sha\_1h, sha\_3h and sha\_6h are the RPKM of the genes in maize treated by shade for 0 h, 1 h, 3 h and 6 h, respectively, in previous study (Wang  
537 et al., 2016).  
538

539 **Figures and figure legends**

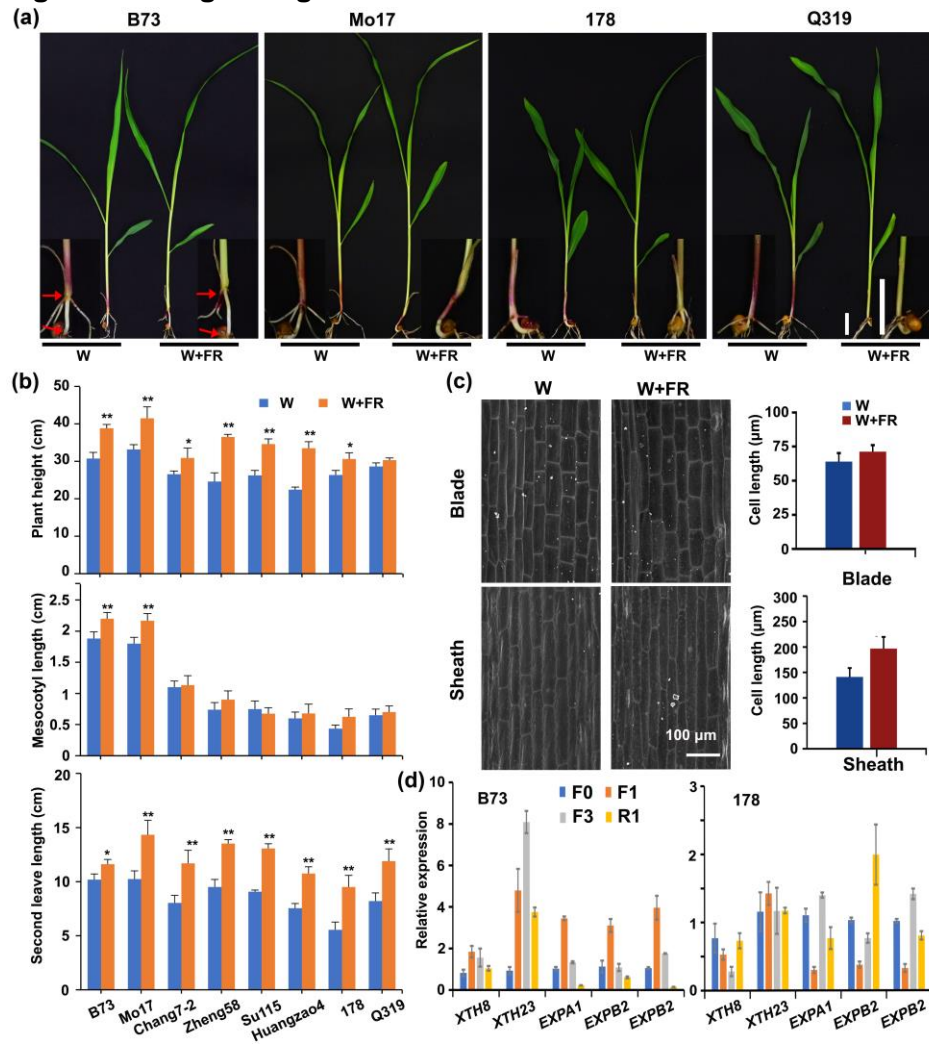

540

541 *Fig. 1. The phenotype of maize seedlings grown under high or low R:FR conditions.*

542 (a) The phenotypes of B73, Mo17, 178, and Q319 seedlings grown under high R:FR  
543 (13.3) and low R: FR light (0.19). Scale bar, 3 cm.

544 (b) The plant height, mesocotyl length, and second-leaf length of different inbred lines.  
545 Data represent the mean and SD of at least 30 seedlings. \*P < 0.05, \*\*P < 0.01

546 (c) SEM and cell length analysis of the blade and sheath tissues of inbred B73 grown  
547 under high or low R:FR conditions. Data represent the mean and SD of at least 100  
548 cells. \*P < 0.05, \*\*P < 0.01

549 (d) RT-qPCR analysis of the transcription level of cell elongation-related genes in B73  
550 and 178 treated with far red light for 0 h (F0), 1 h (F1), and 3 h (F3), and then with red  
551 light for 1 h (R1), respectively. Data are means and SD of three independent biological  
552 replicates.

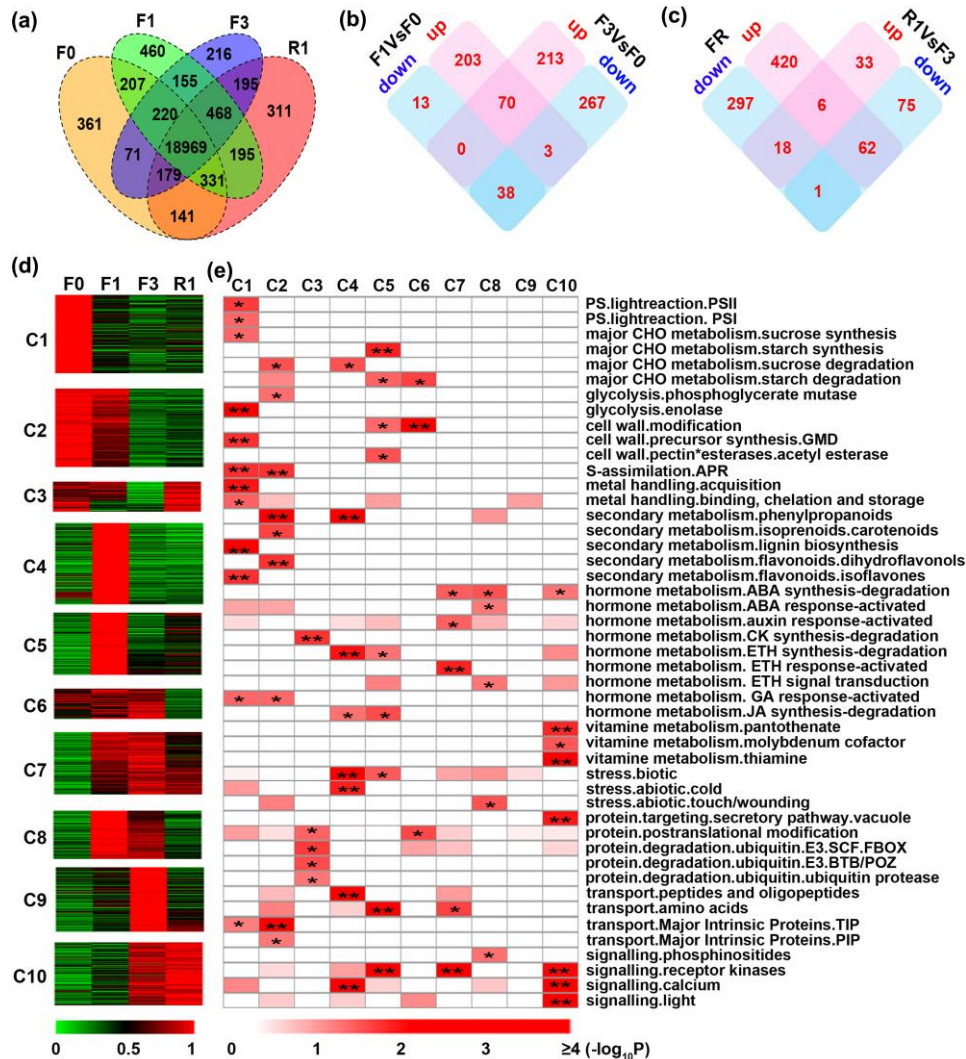

553

554 *Fig. 2. Transcriptome analysis of maize seedling responses to simulated shade.*

555 (a) Venn diagram of the numbers of the expressed genes in B73 seedlings treated with  
556 far red light for 0 h (F0), 1 h (F1), and 3 h (F3), and then with red light for 1 h (R1).

557 (b) Venn diagram of the numbers of DEGs between F1 and F0 (F1 vs. F0) and F3 and  
558 F0 (F3 vs. F0), respectively.

559 (c) Venn diagram of the numbers of the FR DEGs and DEGs between R1 and F3 (R1  
560 vs. F3). FR DEGs refer to the DEGs of F1 vs. F0 and F3 vs. F0, excluding the 3 genes  
561 showing different trends.

562 (d) Ten expression clusters of DEGs (C1–C10), ordered according to the time points  
563 of their peak expression. For each gene, the normalized values are shown.

564 (e) Mapman functional enrichment analysis of DEGs. Fisher's exact test was used to  
565 determine whether a functional category was enriched. \*,  $q < 0.05$ ; \*\*,  $q < 0.01$



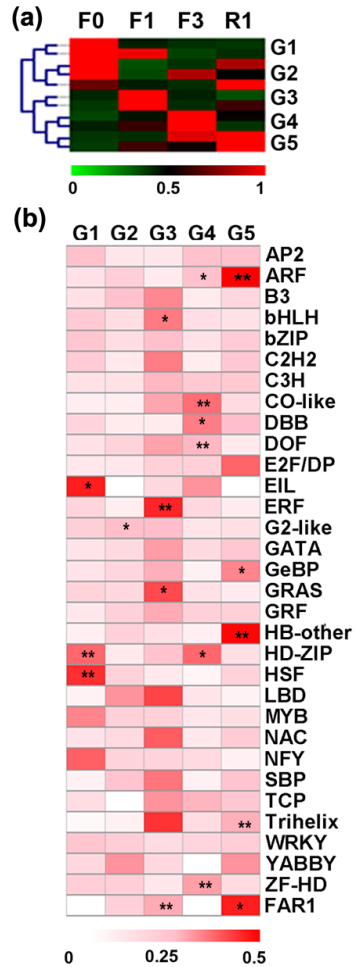

566

567 *Fig. 3. Transcription factor family enrichment analysis.*

568 (a) Five expression groups (G1–G5) of the expressed transcription factors.

569 (b) Transcription factor family enrichment analysis. The values shown are the number

570 of transcription factor family members classified in a cluster: the total number of

571 transcription factor family members. Fisher's exact test was used to determine whether

572 a transcription factor family was enriched. \*,  $q < 0.05$ ; \*\*  $q < 0.01$ .

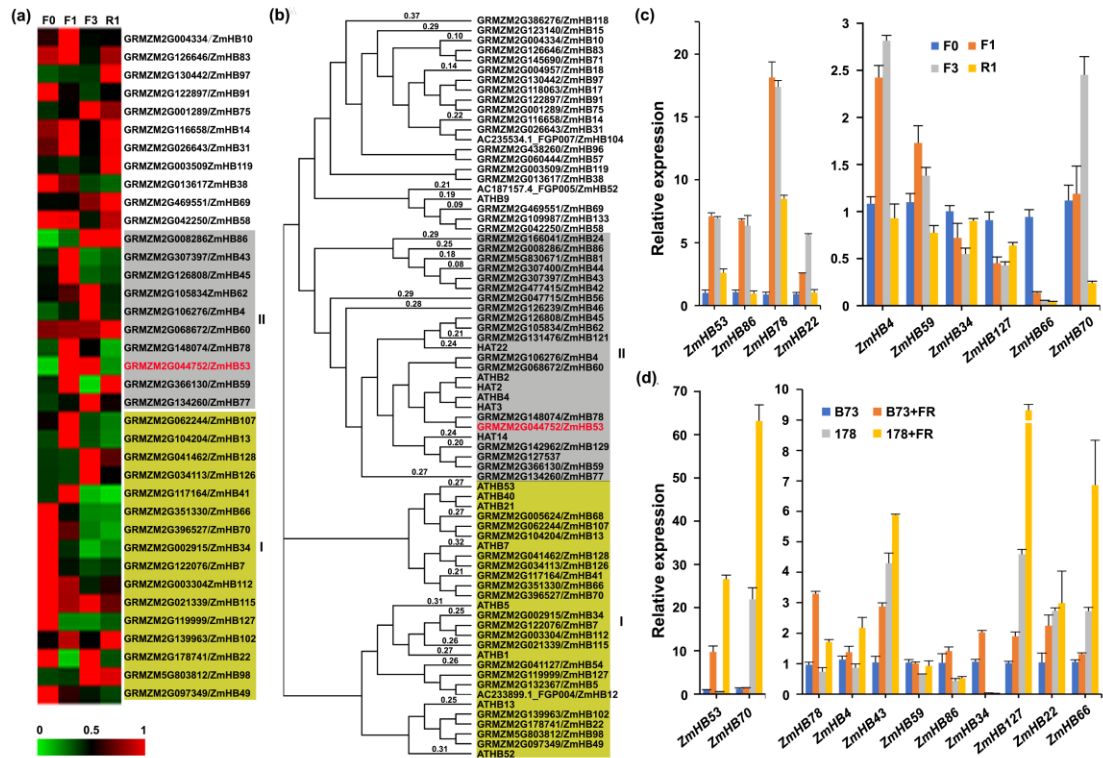

573

574 *Fig. 4. Expression pattern analysis of HD-ZIP members in shade response*

575 (a) Heat map representation of the expression patterns of *HD-ZIPs*. For each gene,  
 576 the value shown is the RPKM value normalized by the maximum values of all RPKM  
 577 values of the gene in F0, F1, F3 and R1. The gene in gray background belong to type  
 578 II *HD-ZIPs*, while in yellow background belong to type I *HD-ZIPs*.

579 (b) Phylogenetic tree of selected *HD-ZIP* family proteins in *Zea mays* (*Zm*) and  
 580 *Arabidopsis thaliana* (*At*). The neighbor-joining method was used to construct the  
 581 phylogenetic tree.

582 (c) RT-qPCR analyses revealed that selected *HD-ZIP* family genes  
 583 were rapidly induced or reduced by far-red or red light. Three-leaf stage seedling plants  
 584 of maize inbred line B73 were used to harvest second leaves, and then used to perform  
 585 RT-qPCR analysis. *Actin* was used as an internal control for RT-qPCR analysis. Data  
 586 are means and SD of three independent biological replicates.

587 (d) RT-qPCR analyses of the expression of selected *HD-ZIP* family genes in B73 and  
 178 lines treated by white or FR for 1h.

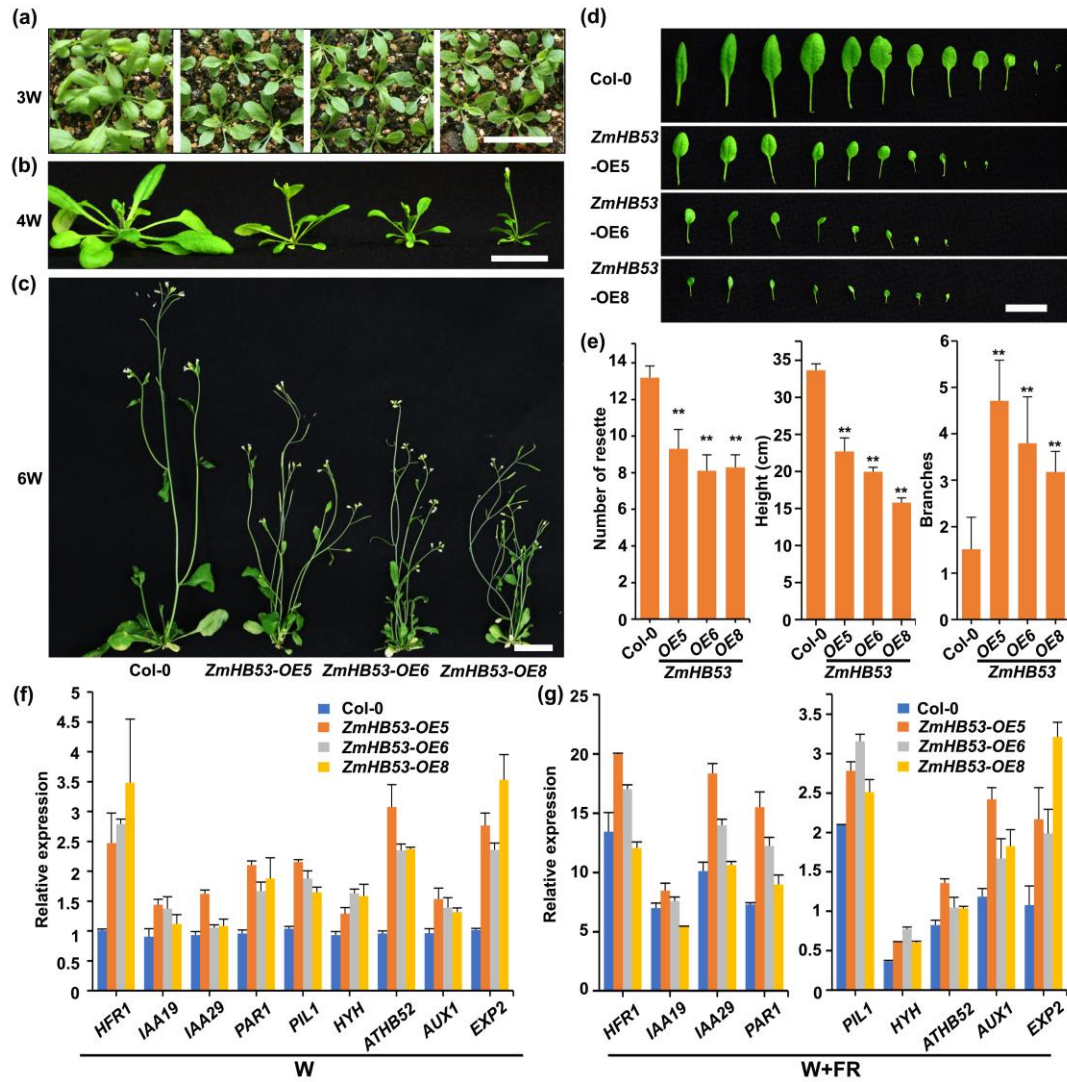

588

589 Fig. 5. Overexpression of *ZmHB53* in wild-type *Arabidopsis Col-0* plants.

590 (a-c), Phenotype of 3-, 4-, and 6-week-old *Arabidopsis* overexpressing *ZmHB53*,  
591 respectively. Scale bar, 2 cm.

592 (d) Leaves of 4-week-old *Arabidopsis* overexpressing *ZmHB53*. Scale bar, 2 cm.

593 (e) Quantification of rosette leaf number shown in B and D, plant height and number  
594 of branches shown in C. Scale bar, 2 cm. \* $P < 0.05$ ; \*\* $P < 0.01$ ;  $n = 20$ .

595 (f-g) RT-qPCR analysis of the expression of selected shade-response genes in  
596 *Arabidopsis* overexpressing *ZmHB53*. Seven-day-old seedlings grown under LD (W,  
597 high R:FR; W+FR, low R:FR) conditions were used. *UBQ1* was used as the internal  
598 control. Data are means and SD of three replicates.

599
